# Supplementary material for: Deciphering Signaling Pathway Networks to Understand the Molecular Mechanisms of Metformin Action
Source: PubMed Central journal article supplement (PMC4470683; doi:10.1371/journal.pcbi.1004202), 2015-06-17

**Figure S2.** Gene Set Enrichment Analysis (GSEA) enrichment score curve for six probe sets (Instance IDs: 61, 1694, 1816, 1858, 5068, and 5487) compared to the probes from one treatment (Instance ID: 1). In each graph, the vertical black lines indicate the position of each of the probes of the studied probe set in the ordered, non-redundant data set. The green curve corresponds to the ES (enrichment score) curve, which is the running sum of the weighted enrichment score obtained from GSEA software.

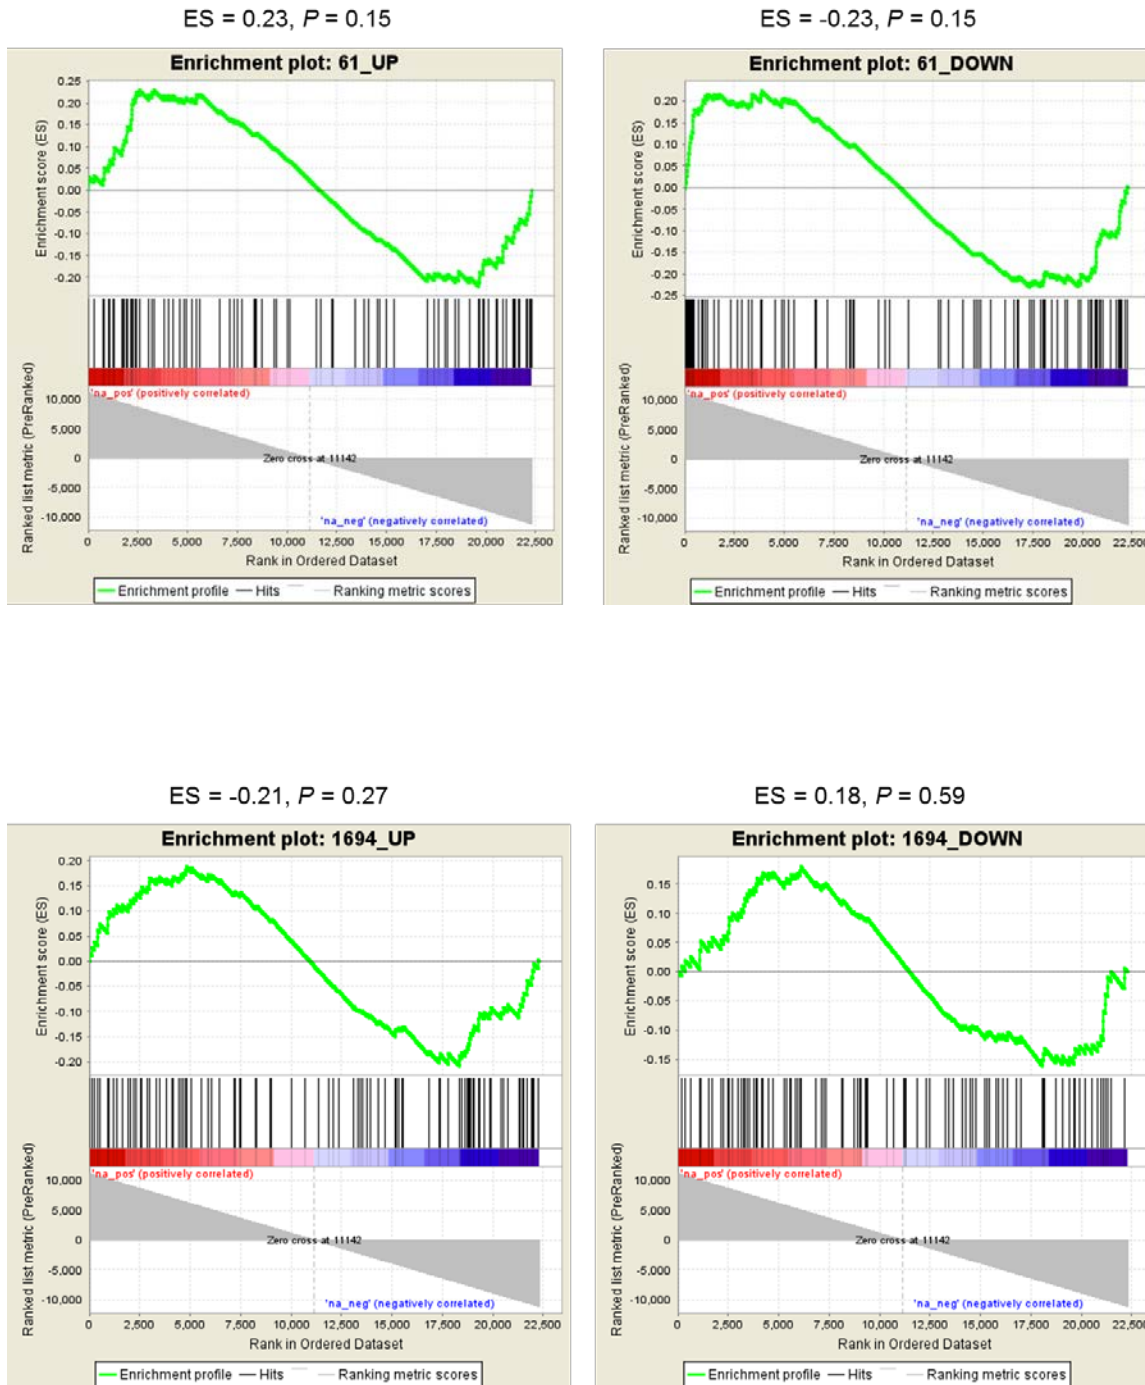

ES = 0.17, P = 0.67

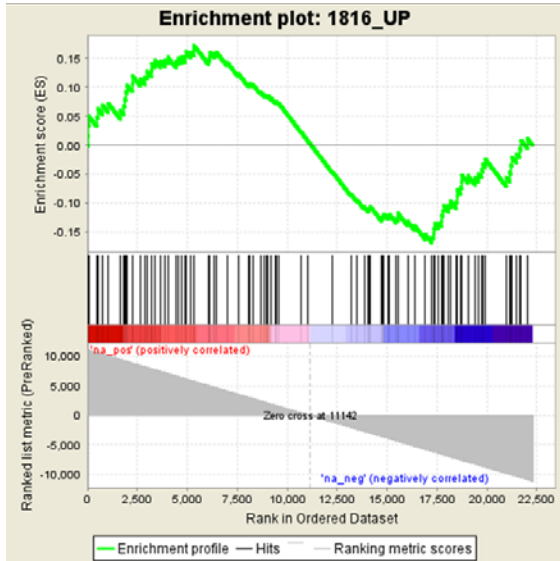

ES = 0.19, P = 0.52

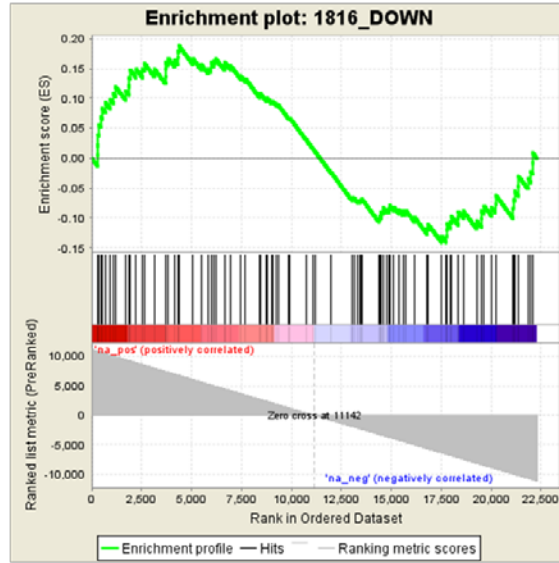

ES = -0.17, P = 0.69

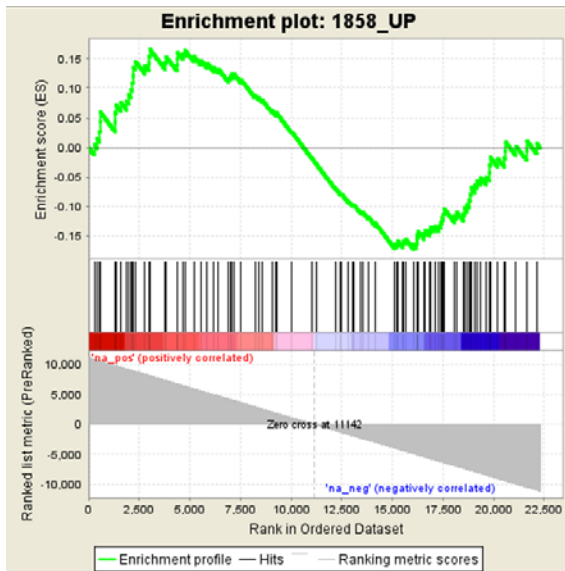

ES = 0.20, P = 0.35

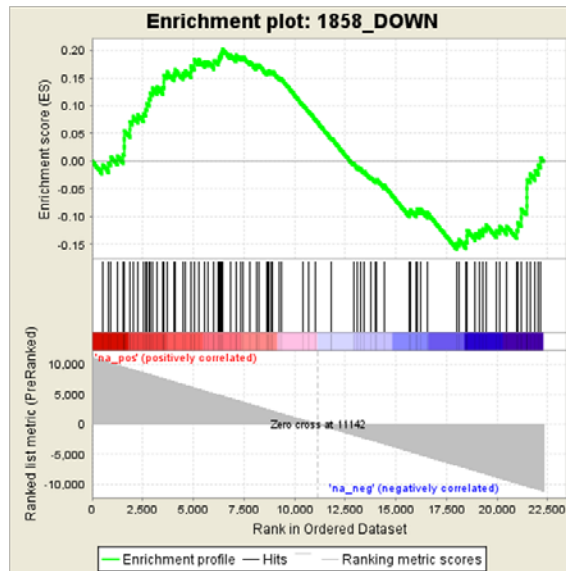

ES = -0.19, P = 0.42

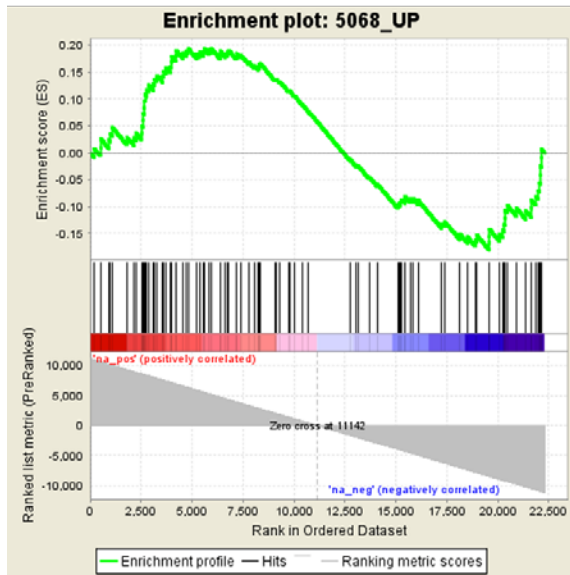

ES = 0.16, P = 0.78

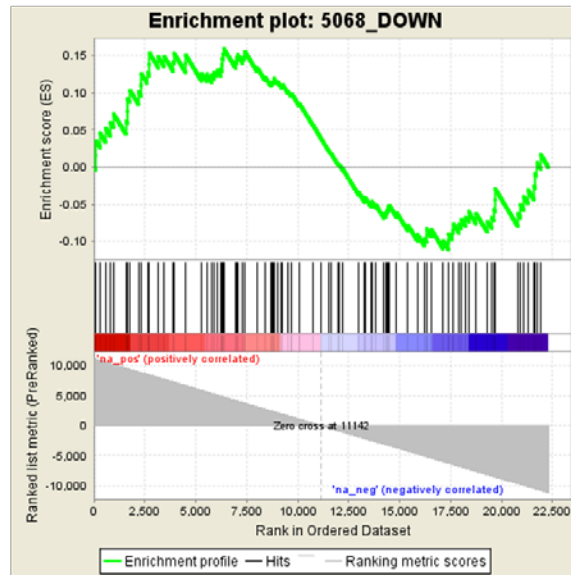

ES = 0.19, P = 0.51

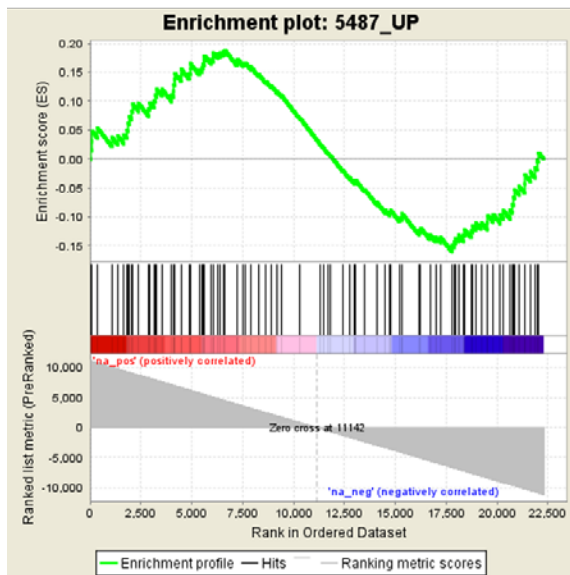

ES = -0.18, P = 0.54

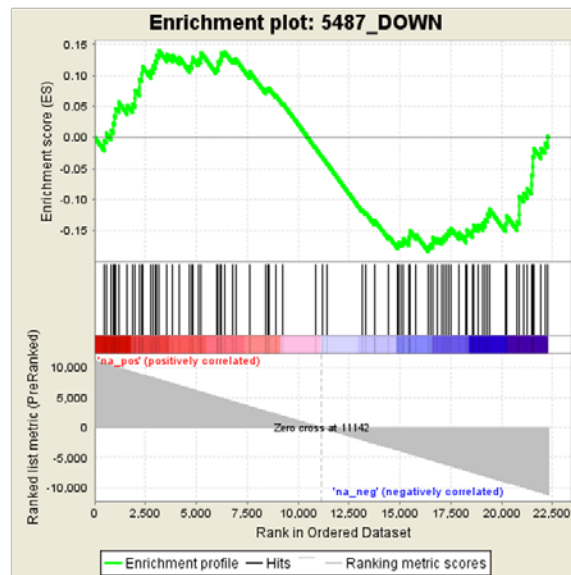

Supplement: pcbi.1004202.s002.pdf [file pcbi.1004202.s002.pdf]
