# Supplementary material for: Deciphering Signaling Pathway Networks to Understand the Molecular Mechanisms of Metformin Action
Source: PLoS Comput Biol. 2015 Jun 17;11(6):e1004202. doi: 10.1371/journal.pcbi.1004202 (PMC4470683; doi:10.1371/journal.pcbi.1004202)
Supplement: S8 Table — (XLSX) [file pcbi.1004202.s020.xlsx]

## Sheet: upstream
Pathway	KEGG ID	Number of genes	P-value	Adjusted P-value	Gene ID	Gene symbol
Insulin signaling pathway	hsa04910	16	5.33e-19	5.33e-17	5563, 5564, 32, 5313, 2475, 5565, 2194, 57521, 3667, 51422, 5770, 6464, 6720, 6198, 10891, 1977	PRKAA2, PRKAB1, ACACB, PKLR, MTOR, PRKAB2, FASN, RPTOR, IRS1, PRKAG2, PTPN1, SHC1, SREBF1, RPS6KB1, PPARGC1A, EIF4E
Adipocytokine signaling pathway	hsa04920	13	1.23e-18	6.15e-17	3667, 5563, 5564, 32, 51422, 2475, 5565, 5443, 6794, 3952, 10891, 9370, 3953	IRS1, PRKAA2, PRKAB1, ACACB, PRKAG2, MTOR, PRKAB2, POMC, STK11, LEP, PPARGC1A, ADIPOQ, LEPR
Neurotrophin signaling pathway	hsa04722	14	1.86e-16	6.2e-15	3667, 7161, 627, 6272, 5607, 8767, 6464, 998, 10782, 51135, 5598, 7533, 4804, 4915	IRS1, TP73, BDNF, SORT1, MAP2K5, RIPK2, SHC1, CDC42, ZNF274, IRAK4, MAPK7, YWHAH, NGFR, NTRK2
Focal adhesion	hsa04510	13	2.19e-12	5.48e-11	5154, 10398, 6464, 4659, 998, 3655, 3688, 3479, 3685, 3611, 5578, 3694, 7057	PDGFA, MYL9, SHC1, PPP1R12A, CDC42, ITGA6, ITGB1, IGF1, ITGAV, ILK, PRKCA, ITGB6, THBS1
p53 signaling pathway	hsa04115	9	9.24e-12	1.85e-10	7161, 4193, 3479, 4194, 472, 25898, 5054, 11200, 7057	TP73, MDM2, IGF1, MDM4, ATM, RCHY1, SERPINE1, CHEK2, THBS1
Metabolic pathways	hsa01100	24	3.73e-11	5.51e-10	1588, 32, 5313, 2194, 10554, 586, 522, 3417, 1576, 3157, 3033, 4830, 1544, 55902, 509, 622, 4831, 47, 57678, 5337, 229, 37, 216, 2222	CYP19A1, ACACB, PKLR, FASN, AGPAT1, BCAT1, ATP5J, IDH1, CYP3A4, HMGCS1, HADH, NME1, CYP1A2, ACSS2, ATP5C1, BDH1, NME2, ACLY, GPAM, PLD1, ALDOB, ACADVL, ALDH1A1, FDFT1
mTOR signaling pathway	hsa04150	8	3.86e-11	5.51e-10	5563, 57521, 2475, 3479, 51719, 6794, 6198, 1977	PRKAA2, RPTOR, MTOR, IGF1, CAB39, STK11, RPS6KB1, EIF4E
Hypertrophic cardiomyopathy (HCM)	hsa05410	9	5.85e-11	7.31e-10	5563, 5564, 51422, 3655, 5565, 3688, 3479, 3685, 3694	PRKAA2, PRKAB1, PRKAG2, ITGA6, PRKAB2, ITGB1, IGF1, ITGAV, ITGB6
Type II diabetes mellitus	hsa04930	7	9.87e-10	9.87e-09	6833, 3667, 3767, 774, 5313, 2475, 9370	ABCC8, IRS1, KCNJ11, CACNA1B, PKLR, MTOR, ADIPOQ
Pathways in cancer	hsa05200	13	9.47e-10	9.87e-09	1030, 5154, 4193, 998, 2475, 3655, 1612, 3688, 3479, 367, 3685, 5337, 5578	CDKN2B, PDGFA, MDM2, CDC42, MTOR, ITGA6, DAPK1, ITGB1, IGF1, AR, ITGAV, PLD1, PRKCA
MAPK signaling pathway	hsa04010	11	1.43e-08	1.3e-07	5154, 10746, 627, 5607, 998, 774, 3552, 5578, 5598, 4915, 6416	PDGFA, MAP3K2, BDNF, MAP2K5, CDC42, CACNA1B, IL1A, PRKCA, MAPK7, NTRK2, MAP2K4
Regulation of actin cytoskeleton	hsa04810	9	2.38e-07	1.98e-06	5154, 10398, 3685, 4659, 998, 3694, 3684, 3655, 3688	PDGFA, MYL9, ITGAV, PPP1R12A, CDC42, ITGB6, ITGAM, ITGA6, ITGB1
Glioma	hsa05214	6	2.68e-07	2.06e-06	5154, 4193, 6464, 5578, 2475, 3479	PDGFA, MDM2, SHC1, PRKCA, MTOR, IGF1
Bile secretion	hsa04976	6	4.56e-07	3.26e-06	8431, 28234, 1576, 3949, 6580, 10599	NR0B2, SLCO1B3, CYP3A4, LDLR, SLC22A1, SLCO1B1
ECM-receptor interaction	hsa04512	6	1.33e-06	8.87e-06	3685, 3694, 3655, 961, 7057, 3688	ITGAV, ITGB6, ITGA6, CD47, THBS1, ITGB1
Gap junction	hsa04540	6	1.86e-06	1.09e-05	5154, 10746, 5607, 1813, 5598, 5578	PDGFA, MAP3K2, MAP2K5, DRD2, MAPK7, PRKCA
Prostate cancer	hsa05215	6	1.74e-06	1.09e-05	5154, 367, 4193, 1385, 2475, 3479	PDGFA, AR, MDM2, CREB1, MTOR, IGF1
Maturity onset diabetes of the young	hsa04950	4	3.03e-06	1.68e-05	2494, 5313, 50674, 3171	NR5A2, PKLR, NEUROG3, FOXA3
GnRH signaling pathway	hsa04912	6	3.65e-06	1.92e-05	10746, 5337, 5598, 998, 5578, 6416	MAP3K2, PLD1, MAPK7, CDC42, PRKCA, MAP2K4
PPAR signaling pathway	hsa03320	5	9.88e-06	4.94e-05	4023, 3611, 9370, 1622, 336	LPL, ILK, ADIPOQ, DBI, APOA2
Cell cycle	hsa04110	6	1.19e-05	5.67e-05	472, 1030, 993, 4193, 11200, 7533	ATM, CDKN2B, CDC25A, MDM2, CHEK2, YWHAH
Endocytosis	hsa04144	7	1.89e-05	8.59e-05	5868, 26119, 4193, 5337, 30844, 998, 3949	RAB5A, LDLRAP1, MDM2, PLD1, EHD4, CDC42, LDLR
ErbB signaling pathway	hsa04012	5	2.85e-05	0.0001	6198, 6464, 5578, 2475, 6416	RPS6KB1, SHC1, PRKCA, MTOR, MAP2K4
TGF-beta signaling pathway	hsa04350	5	2.41e-05	0.0001	1030, 6198, 4086, 654, 7057	CDKN2B, RPS6KB1, SMAD1, BMP6, THBS1
Dilated cardiomyopathy	hsa05414	5	3.36e-05	0.0001	3685, 3694, 3655, 3688, 3479	ITGAV, ITGB6, ITGA6, ITGB1, IGF1
Leukocyte transendothelial migration	hsa04670	5	0.0001	0.0004	10398, 998, 5578, 3684, 3688	MYL9, CDC42, PRKCA, ITGAM, ITGB1
Fatty acid biosynthesis	hsa00061	2	0.0002	0.0006	32, 2194	ACACB, FASN
Butanoate metabolism	hsa00650	3	0.0002	0.0006	3157, 3033, 622	HMGCS1, HADH, BDH1
Bacterial invasion of epithelial cells	hsa05100	4	0.0002	0.0006	6464, 3611, 998, 3688	SHC1, ILK, CDC42, ITGB1
Leishmaniasis	hsa05140	4	0.0002	0.0006	3552, 3684, 51135, 3688	IL1A, ITGAM, IRAK4, ITGB1
Toxoplasmosis	hsa05145	5	0.0002	0.0006	2775, 3655, 51135, 3949, 3688	GNAO1, ITGA6, IRAK4, LDLR, ITGB1
Arrhythmogenic right ventricular cardiomyopathy (ARVC)	hsa05412	4	0.0002	0.0006	3685, 3694, 3655, 3688	ITGAV, ITGB6, ITGA6, ITGB1
Glycerophospholipid metabolism	hsa00564	4	0.0003	0.0009	3931, 57678, 5337, 10554	LCAT, GPAM, PLD1, AGPAT1
Phagosome	hsa04145	5	0.0004	0.0011	5868, 3685, 3684, 7057, 3688	RAB5A, ITGAV, ITGAM, THBS1, ITGB1
Small cell lung cancer	hsa05222	4	0.0004	0.0011	1030, 3685, 3655, 3688	CDKN2B, ITGAV, ITGA6, ITGB1
Hematopoietic cell lineage	hsa04640	4	0.0005	0.0014	3552, 3684, 3655, 928	IL1A, ITGAM, ITGA6, CD9
Synthesis and degradation of ketone bodies	hsa00072	2	0.0006	0.0015	3157, 622	HMGCS1, BDH1
Pyruvate metabolism	hsa00620	3	0.0006	0.0015	32, 5313, 55902	ACACB, PKLR, ACSS2
Fc gamma R-mediated phagocytosis	hsa04666	4	0.0006	0.0015	6198, 5337, 998, 5578	RPS6KB1, PLD1, CDC42, PRKCA
Alzheimer's disease	hsa05010	5	0.0006	0.0015	348, 4023, 6868, 522, 509	APOE, LPL, ADAM17, ATP5J, ATP5C1
Aldosterone-regulated sodium reabsorption	hsa04960	3	0.0007	0.0017	3667, 5578, 3479	IRS1, PRKCA, IGF1
Bladder cancer	hsa05219	3	0.0007	0.0017	4193, 1612, 7057	MDM2, DAPK1, THBS1
Valine, leucine and isoleucine degradation	hsa00280	3	0.0008	0.0018	586, 3157, 3033	BCAT1, HMGCS1, HADH
Cytokine-cytokine receptor interaction	hsa04060	6	0.0008	0.0018	5154, 3952, 3552, 4804, 3953, 6346	PDGFA, LEP, IL1A, NGFR, LEPR, CCL1
Neuroactive ligand-receptor interaction	hsa04080	6	0.0009	0.0018	4158, 3952, 1813, 3973, 2917, 3953	MC2R, LEP, DRD2, LHCGR, GRM7, LEPR
Notch signaling pathway	hsa04330	3	0.0009	0.0018	3516, 6868, 9794	RBPJ, ADAM17, MAML1
Melanogenesis	hsa04916	4	0.0008	0.0018	5443, 1385, 5578, 2775	POMC, CREB1, PRKCA, GNAO1
Fat digestion and absorption	hsa04975	3	0.0009	0.0018	4547, 337, 10554	MTTP, APOA4, AGPAT1
Huntington's disease	hsa05016	5	0.0009	0.0018	627, 1385, 10891, 522, 509	BDNF, CREB1, PPARGC1A, ATP5J, ATP5C1
Chagas disease (American trypanosomiasis)	hsa05142	4	0.0009	0.0018	5054, 2775, 6416, 51135	SERPINE1, GNAO1, MAP2K4, IRAK4
Glycerolipid metabolism	hsa00561	3	0.0011	0.0022	4023, 57678, 10554	LPL, GPAM, AGPAT1
Pathogenic Escherichia coli infection	hsa05130	3	0.0015	0.0029	998, 5578, 3688	CDC42, PRKCA, ITGB1
Osteoclast differentiation	hsa04380	4	0.0019	0.0036	1540, 1385, 3552, 4772	CYLD, CREB1, IL1A, NFATC1
Shigellosis	hsa05131	3	0.002	0.0037	8767, 998, 3688	RIPK2, CDC42, ITGB1
Cell adhesion molecules (CAMs)	hsa04514	4	0.0021	0.0038	3685, 3684, 3655, 3688	ITGAV, ITGAM, ITGA6, ITGB1
Retinol metabolism	hsa00830	3	0.0022	0.0039	1544, 216, 1576	CYP1A2, ALDH1A1, CYP3A4
Glycolysis / Gluconeogenesis	hsa00010	3	0.0023	0.004	229, 5313, 55902	ALDOB, PKLR, ACSS2
Epithelial cell signaling in Helicobacter pylori infection	hsa05120	3	0.0027	0.0047	6868, 998, 6416	ADAM17, CDC42, MAP2K4
Long-term depression	hsa04730	3	0.0029	0.0049	5578, 2775, 3479	PRKCA, GNAO1, IGF1
Melanoma	hsa05218	3	0.003	0.005	5154, 4193, 3479	PDGFA, MDM2, IGF1
VEGF signaling pathway	hsa04370	3	0.0037	0.0061	998, 5578, 4772	CDC42, PRKCA, NFATC1
Purine metabolism	hsa00230	4	0.0043	0.0069	4830, 5313, 5152, 4831	NME1, PKLR, PDE9A, NME2
Apoptosis	hsa04210	3	0.0053	0.0084	472, 3552, 51135	ATM, IL1A, IRAK4
Citrate cycle (TCA cycle)	hsa00020	2	0.0065	0.01	3417, 47	IDH1, ACLY
Linoleic acid metabolism	hsa00591	2	0.0065	0.01	1544, 1576	CYP1A2, CYP3A4
Propanoate metabolism	hsa00640	2	0.0074	0.0112	32, 55902	ACACB, ACSS2
Amoebiasis	hsa05146	3	0.0092	0.0137	5868, 5578, 3684	RAB5A, PRKCA, ITGAM
T cell receptor signaling pathway	hsa04660	3	0.0097	0.0143	998, 4772, 8915	CDC42, NFATC1, BCL10
Oocyte meiosis	hsa04114	3	0.0107	0.0155	367, 7533, 3479	AR, YWHAH, IGF1
Vascular smooth muscle contraction	hsa04270	3	0.0117	0.0167	10398, 4659, 5578	MYL9, PPP1R12A, PRKCA
Tryptophan metabolism	hsa00380	2	0.0125	0.0176	3033, 1544	HADH, CYP1A2
Fatty acid metabolism	hsa00071	2	0.0131	0.0182	3033, 37	HADH, ACADVL
Lysine degradation	hsa00310	2	0.0137	0.0183	3033, 9869	HADH, SETDB1
ABC transporters	hsa02010	2	0.0137	0.0183	6833, 225	ABCC8, ABCD2
Vasopressin-regulated water reabsorption	hsa04962	2	0.0137	0.0183	5868, 1385	RAB5A, CREB1
Axon guidance	hsa04360	3	0.0156	0.0205	998, 4772, 3688	CDC42, NFATC1, ITGB1
Tight junction	hsa04530	3	0.0165	0.0214	10398, 998, 5578	MYL9, CDC42, PRKCA
Natural killer cell mediated cytotoxicity	hsa04650	3	0.0179	0.0229	6464, 5578, 4772	SHC1, PRKCA, NFATC1
Steroid hormone biosynthesis	hsa00140	2	0.0216	0.0273	1588, 1576	CYP19A1, CYP3A4
Acute myeloid leukemia	hsa05221	2	0.0223	0.0279	6198, 2475	RPS6KB1, MTOR
Long-term potentiation	hsa04720	2	0.0327	0.0399	4659, 5578	PPP1R12A, PRKCA
Pancreatic cancer	hsa05212	2	0.0327	0.0399	5337, 998	PLD1, CDC42
Metabolism of xenobiotics by cytochrome P450	hsa00980	2	0.0335	0.0404	1544, 1576	CYP1A2, CYP3A4
Drug metabolism - cytochrome P450	hsa00982	2	0.0353	0.0406	1544, 1576	CYP1A2, CYP3A4
Calcium signaling pathway	hsa04020	3	0.0352	0.0406	774, 3973, 5578	CACNA1B, LHCGR, PRKCA
Adherens junction	hsa04520	2	0.0353	0.0406	5770, 998	PTPN1, CDC42
Chronic myeloid leukemia	hsa05220	2	0.0353	0.0406	4193, 6464	MDM2, SHC1
B cell receptor signaling pathway	hsa04662	2	0.0371	0.0422	4772, 8915	NFATC1, BCL10
Antigen processing and presentation	hsa04612	2	0.038	0.0427	1385, 4801	CREB1, NFYB
Peroxisome	hsa04146	2	0.0407	0.0447	225, 3417	ABCD2, IDH1
Fc epsilon RI signaling pathway	hsa04664	2	0.0407	0.0447	5578, 6416	PRKCA, MAP2K4
Chemokine signaling pathway	hsa04062	3	0.0415	0.0451	6464, 998, 6346	SHC1, CDC42, CCL1

## Sheet: Downstream
Pathway	KEGG ID	Number of genes	P-value	Adjusted P-value	Gene ID	Gene symbol
Pathways in cancer	hsa05200	42	9.97e-43	1.12e-40	4318, 1284, 2308, 6256, 2064, 54205, 598, 7042, 2113, 5156, 5155, 2122, 3725, 2737, 5582, 1282, 596, 6774, 5970, 5915, 387, 5914, 7704, 207, 7039, 4312, 2277, 6932, 354, 2353, 6934, 5595, 6257, 4088, 5467, 83439, 3716, 332, 6469, 3065, 5594, 4089	MMP9, COL4A2, FOXO1, RXRA, ERBB2, CYCS, BCL2L1, TGFB2, ETS1, PDGFRA, PDGFB, MECOM, JUN, GLI3, PRKCG, COL4A1, BCL2, STAT3, RELA, RARB, RHOA, RARA, ZBTB16, AKT1, TGFA, MMP1, FIGF, TCF7, KLK3, FOS, TCF7L2, MAPK3, RXRB, SMAD3, PPARD, TCF7L1, JAK1, BIRC5, SHH, HDAC1, MAPK1, SMAD4
Colorectal cancer	hsa05210	15	2.73e-20	1.53e-18	4088, 3725, 83439, 387, 207, 332, 54205, 596, 6932, 7042, 2353, 5594, 4089, 6934, 5595	SMAD3, JUN, TCF7L1, RHOA, AKT1, BIRC5, CYCS, BCL2, TCF7, TGFB2, FOS, MAPK1, SMAD4, TCF7L2, MAPK3
Focal adhesion	hsa04510	21	6.66e-20	2.49e-18	387, 207, 1284, 57144, 3676, 3678, 2064, 2277, 859, 5156, 5155, 5595, 3725, 5582, 1280, 596, 1282, 1278, 3691, 8515, 5594	RHOA, AKT1, COL4A2, PAK7, ITGA4, ITGA5, ERBB2, FIGF, CAV3, PDGFRA, PDGFB, MAPK3, JUN, PRKCG, COL2A1, BCL2, COL4A1, COL1A2, ITGB4, ITGA10, MAPK1
Prostate cancer	hsa05215	15	9.67e-18	2.71e-16	83439, 468, 207, 2308, 7039, 2064, 596, 6932, 354, 5594, 5970, 5155, 5156, 6934, 5595	TCF7L1, ATF4, AKT1, FOXO1, TGFA, ERBB2, BCL2, TCF7, KLK3, MAPK1, RELA, PDGFB, PDGFRA, TCF7L2, MAPK3
Osteoclast differentiation	hsa04380	16	1.1e-16	2.46e-15	207, 7042, 2355, 2353, 5595, 3727, 3725, 8600, 1535, 3716, 2354, 3726, 5970, 8061, 5594, 1536	AKT1, TGFB2, FOSL2, FOS, MAPK3, JUND, JUN, TNFSF11, CYBA, JAK1, FOSB, JUNB, RELA, FOSL1, MAPK1, CYBB
Pancreatic cancer	hsa05212	13	3.97e-16	7.41e-15	4088, 3716, 207, 7039, 2064, 2277, 598, 7042, 6774, 5970, 5594, 4089, 5595	SMAD3, JAK1, AKT1, TGFA, ERBB2, FIGF, BCL2L1, TGFB2, STAT3, RELA, MAPK1, SMAD4, MAPK3
Acute myeloid leukemia	hsa05221	12	1.09e-15	1.74e-14	5467, 83439, 5914, 207, 7704, 6932, 5292, 6774, 5594, 5970, 6934, 5595	PPARD, TCF7L1, RARA, AKT1, ZBTB16, TCF7, PIM1, STAT3, MAPK1, RELA, TCF7L2, MAPK3
MAPK signaling pathway	hsa04010	18	8.1e-14	1.13e-12	468, 207, 8649, 7042, 2353, 5155, 5156, 5595, 3727, 2122, 3725, 5582, 6722, 5970, 1386, 5594, 4137, 27330	ATF4, AKT1, LAMTOR3, TGFB2, FOS, PDGFB, PDGFRA, MAPK3, JUND, MECOM, JUN, PRKCG, SRF, RELA, ATF2, MAPK1, MAPT, RPS6KA6
PPAR signaling pathway	hsa03320	11	5.31e-13	6.61e-12	5467, 2710, 6256, 2169, 4312, 34, 1582, 10062, 5106, 5360, 6257	PPARD, GK, RXRA, FABP2, MMP1, ACADM, CYP8B1, NR1H3, PCK2, PLTP, RXRB
Renal cell carcinoma	hsa05211	10	1.66e-11	1.86e-10	3725, 207, 57144, 7039, 2277, 7042, 5155, 5594, 2113, 5595	JUN, AKT1, PAK7, TGFA, FIGF, TGFB2, PDGFB, MAPK1, ETS1, MAPK3
Leishmaniasis	hsa05140	10	2.22e-11	2.26e-10	3725, 3716, 1535, 3676, 3565, 7042, 5970, 5594, 2353, 5595	JUN, JAK1, CYBA, ITGA4, IL4, TGFB2, RELA, MAPK1, FOS, MAPK3
Chronic myeloid leukemia	hsa05220	10	2.56e-11	2.39e-10	4088, 207, 3065, 598, 7042, 5970, 5594, 4089, 5595, 2122	SMAD3, AKT1, HDAC1, BCL2L1, TGFB2, RELA, MAPK1, SMAD4, MAPK3, MECOM
Non-small cell lung cancer	hsa05223	9	4.11e-11	3.54e-10	5915, 5582, 207, 7039, 6256, 2064, 5594, 6257, 5595	RARB, PRKCG, AKT1, TGFA, RXRA, ERBB2, MAPK1, RXRB, MAPK3
Small cell lung cancer	hsa05222	10	1.21e-10	9.68e-10	5915, 207, 1284, 6256, 54205, 596, 1282, 598, 5970, 6257	RARB, AKT1, COL4A2, RXRA, CYCS, BCL2, COL4A1, BCL2L1, RELA, RXRB
Thyroid cancer	hsa05216	7	3.92e-10	2.93e-09	6932, 83439, 5594, 6934, 6256, 5595, 6257	TCF7, TCF7L1, MAPK1, TCF7L2, RXRA, MAPK3, RXRB
Adherens junction	hsa04520	9	6.79e-10	4.72e-09	4088, 2064, 6932, 83439, 387, 5594, 4089, 6934, 5595	SMAD3, ERBB2, TCF7, TCF7L1, RHOA, MAPK1, SMAD4, TCF7L2, MAPK3
Hepatitis C	hsa05160	11	7.17e-10	4.72e-09	5610, 3716, 207, 6256, 5521, 3661, 10062, 6774, 5594, 5970, 5595	EIF2AK2, JAK1, AKT1, RXRA, PPP2R2B, IRF3, NR1H3, STAT3, MAPK1, RELA, MAPK3
T cell receptor signaling pathway	hsa04660	10	1.32e-09	8.21e-09	5788, 3725, 387, 207, 57144, 3565, 5970, 5594, 2353, 5595	PTPRC, JUN, RHOA, AKT1, PAK7, IL4, RELA, MAPK1, FOS, MAPK3
Toxoplasmosis	hsa05145	10	9.39e-09	5.54e-08	3716, 207, 54205, 596, 598, 7042, 6774, 5970, 5594, 5595	JAK1, AKT1, CYCS, BCL2, BCL2L1, TGFB2, STAT3, RELA, MAPK1, MAPK3
Chagas disease (American trypanosomiasis)	hsa05142	9	1.63e-08	9.13e-08	4088, 3725, 207, 5521, 7042, 5970, 5594, 2353, 5595	SMAD3, JUN, AKT1, PPP2R2B, TGFB2, RELA, MAPK1, FOS, MAPK3
Arrhythmogenic right ventricular cardiomyopathy (ARVC)	hsa05412	8	1.78e-08	9.49e-08	83439, 1756, 3676, 3678, 6932, 8515, 3691, 6934	TCF7L1, DMD, ITGA4, ITGA5, TCF7, ITGA10, ITGB4, TCF7L2
Endometrial cancer	hsa05213	7	2.99e-08	1.52e-07	2064, 6932, 83439, 207, 5594, 6934, 5595	ERBB2, TCF7, TCF7L1, AKT1, MAPK1, TCF7L2, MAPK3
Wnt signaling pathway	hsa04310	10	3.2e-08	1.56e-07	4088, 3725, 5467, 83439, 387, 5582, 6932, 8061, 4089, 6934	SMAD3, JUN, PPARD, TCF7L1, RHOA, PRKCG, TCF7, FOSL1, SMAD4, TCF7L2
ECM-receptor interaction	hsa04512	8	5.36e-08	2.5e-07	1284, 3676, 1280, 3678, 1282, 1278, 8515, 3691	COL4A2, ITGA4, COL2A1, ITGA5, COL4A1, COL1A2, ITGA10, ITGB4
ErbB signaling pathway	hsa04012	8	6.44e-08	2.89e-07	2064, 3725, 5582, 207, 57144, 5594, 7039, 5595	ERBB2, JUN, PRKCG, AKT1, PAK7, MAPK1, TGFA, MAPK3
Regulation of actin cytoskeleton	hsa04810	11	9.03e-08	3.87e-07	387, 57144, 3676, 3678, 3687, 8515, 3691, 5155, 5156, 5594, 5595	RHOA, PAK7, ITGA4, ITGA5, ITGAX, ITGA10, ITGB4, PDGFB, PDGFRA, MAPK1, MAPK3
Neurotrophin signaling pathway	hsa04722	9	9.33e-08	3.87e-07	3725, 387, 468, 207, 596, 5970, 5594, 5595, 27330	JUN, RHOA, ATF4, AKT1, BCL2, RELA, MAPK1, MAPK3, RPS6KA6
Glioma	hsa05214	7	1.45e-07	5.8e-07	5582, 207, 5594, 5156, 5155, 7039, 5595	PRKCG, AKT1, MAPK1, PDGFRA, PDGFB, TGFA, MAPK3
Bladder cancer	hsa05219	6	2.07e-07	7.99e-07	4318, 4312, 2064, 2277, 5594, 5595	MMP9, MMP1, ERBB2, FIGF, MAPK1, MAPK3
Toll-like receptor signaling pathway	hsa04620	8	2.23e-07	8.33e-07	3725, 3661, 207, 2353, 5594, 5970, 942, 5595	JUN, IRF3, AKT1, FOS, MAPK1, RELA, CD86, MAPK3
Jak-STAT signaling pathway	hsa04630	9	5.1e-07	1.84e-06	2689, 3716, 207, 3565, 5292, 598, 6774, 3718, 9655	GH2, JAK1, AKT1, IL4, PIM1, BCL2L1, STAT3, JAK3, SOCS5
Adipocytokine signaling pathway	hsa04920	6	3.79e-06	1.33e-05	5106, 207, 6774, 5970, 6256, 6257	PCK2, AKT1, STAT3, RELA, RXRA, RXRB
Amoebiasis	hsa05146	7	4.12e-06	1.4e-05	1282, 5582, 1278, 7042, 1284, 5970, 1280	COL4A1, PRKCG, COL1A2, TGFB2, COL4A2, RELA, COL2A1
B cell receptor signaling pathway	hsa04662	6	6.73e-06	2.22e-05	3725, 207, 2353, 5594, 5970, 5595	JUN, AKT1, FOS, MAPK1, RELA, MAPK3
Hypertrophic cardiomyopathy (HCM)	hsa05410	6	1.21e-05	3.87e-05	3678, 3691, 7042, 1756, 8515, 3676	ITGA5, ITGB4, TGFB2, DMD, ITGA10, ITGA4
TGF-beta signaling pathway	hsa04350	6	1.3e-05	4.04e-05	4088, 387, 7042, 5594, 4089, 5595	SMAD3, RHOA, TGFB2, MAPK1, SMAD4, MAPK3
Apoptosis	hsa04210	6	1.59e-05	4.81e-05	596, 54205, 598, 207, 5970, 823	BCL2, CYCS, BCL2L1, AKT1, RELA, CAPN1
mTOR signaling pathway	hsa04150	5	1.64e-05	4.83e-05	2277, 207, 5594, 5595, 27330	FIGF, AKT1, MAPK1, MAPK3, RPS6KA6
Dilated cardiomyopathy	hsa05414	6	1.93e-05	5.54e-05	3678, 3691, 7042, 1756, 8515, 3676	ITGA5, ITGB4, TGFB2, DMD, ITGA10, ITGA4
Rheumatoid arthritis	hsa05323	6	2.05e-05	5.74e-05	4312, 3725, 8600, 7042, 2353, 942	MMP1, JUN, TNFSF11, TGFB2, FOS, CD86
Basal cell carcinoma	hsa05217	5	2.16e-05	5.9e-05	6932, 83439, 2737, 6934, 6469	TCF7, TCF7L1, GLI3, TCF7L2, SHH
Chemokine signaling pathway	hsa04062	8	2.25e-05	6e-05	387, 10681, 207, 6774, 5594, 5970, 3718, 5595	RHOA, GNB5, AKT1, STAT3, MAPK1, RELA, JAK3, MAPK3
Melanogenesis	hsa04916	6	3.71e-05	9.66e-05	6932, 83439, 5582, 5594, 6934, 5595	TCF7, TCF7L1, PRKCG, MAPK1, TCF7L2, MAPK3
Renin-angiotensin system	hsa04614	3	0.0001	0.0002	185, 5972, 290	AGTR1, REN, ANPEP
Leukocyte transendothelial migration	hsa04670	6	8.06e-05	0.0002	4318, 387, 5582, 1535, 3676, 1536	MMP9, RHOA, PRKCG, CYBA, ITGA4, CYBB
Protein digestion and absorption	hsa04974	5	0.0001	0.0002	1282, 1278, 1284, 2006, 1280	COL4A1, COL1A2, COL4A2, ELN, COL2A1
Axon guidance	hsa04360	6	0.0001	0.0002	387, 57144, 5594, 10507, 2242, 5595	RHOA, PAK7, MAPK1, SEMA4D, FES, MAPK3
Bile secretion	hsa04976	5	7.48e-05	0.0002	1244, 5244, 10864, 6256, 6822	ABCC2, ABCB4, SLC22A7, RXRA, SULT2A1
Melanoma	hsa05218	5	7.48e-05	0.0002	207, 5594, 5156, 5155, 5595	AKT1, MAPK1, PDGFRA, PDGFB, MAPK3
Long-term potentiation	hsa04720	5	6.98e-05	0.0002	5582, 468, 5594, 5595, 27330	PRKCG, ATF4, MAPK1, MAPK3, RPS6KA6
Cell adhesion molecules (CAMs)	hsa04514	6	0.0002	0.0004	5788, 29126, 8174, 942, 3676, 3133	PTPRC, CD274, MADCAM1, CD86, ITGA4, HLA-E
Insulin signaling pathway	hsa04910	6	0.0002	0.0004	5106, 207, 2308, 5594, 9322, 5595	PCK2, AKT1, FOXO1, MAPK1, TRIP10, MAPK3
Metabolic pathways	hsa01100	18	0.0002	0.0004	6898, 2678, 2710, 5625, 1559, 2729, 64131, 1798, 1582, 4953, 1585, 290, 3620, 2027, 1537, 34, 5106, 1109	TAT, GGT1, GK, PRODH, CYP2C9, GCLC, XYLT1, DPAGT1, CYP8B1, ODC1, CYP11B2, ANPEP, IDO1, ENO3, CYC1, ACADM, PCK2, AKR1C4
Endocytosis	hsa04144	7	0.0002	0.0004	4088, 387, 1601, 7042, 859, 5156, 3133	SMAD3, RHOA, DAB2, TGFB2, CAV3, PDGFRA, HLA-E
Glutathione metabolism	hsa00480	4	0.0002	0.0004	2678, 4953, 2729, 290	GGT1, ODC1, GCLC, ANPEP
Intestinal immune network for IgA production	hsa04672	4	0.0002	0.0004	8174, 942, 3676, 3565	MADCAM1, CD86, ITGA4, IL4
Gap junction	hsa04540	5	0.0002	0.0004	5582, 5594, 5156, 5155, 5595	PRKCG, MAPK1, PDGFRA, PDGFB, MAPK3
Hematopoietic cell lineage	hsa04640	5	0.0002	0.0004	3678, 3676, 7066, 3565, 290	ITGA5, ITGA4, THPO, IL4, ANPEP
Fc gamma R-mediated phagocytosis	hsa04666	5	0.0003	0.0006	5788, 5582, 207, 5594, 5595	PTPRC, PRKCG, AKT1, MAPK1, MAPK3
Neuroactive ligand-receptor interaction	hsa04080	8	0.0003	0.0006	2689, 185, 2908, 7067, 5340, 1145, 4988, 6915	GH2, AGTR1, NR3C1, THRA, PLG, CHRNE, OPRM1, TBXA2R
NOD-like receptor signaling pathway	hsa04621	4	0.0004	0.0007	10910, 5594, 5970, 5595	SUGT1, MAPK1, RELA, MAPK3
Dorso-ventral axis formation	hsa04320	3	0.0004	0.0007	2113, 5594, 5595	ETS1, MAPK1, MAPK3
Shigellosis	hsa05131	4	0.0005	0.0009	3678, 5594, 5970, 5595	ITGA5, MAPK1, RELA, MAPK3
Alzheimer's disease	hsa05010	6	0.0006	0.001	54205, 1537, 5594, 4137, 823, 5595	CYCS, CYC1, MAPK1, MAPT, CAPN1, MAPK3
Vascular smooth muscle contraction	hsa04270	5	0.0007	0.0012	387, 5582, 185, 5594, 5595	RHOA, PRKCG, AGTR1, MAPK1, MAPK3
Calcium signaling pathway	hsa04020	6	0.0008	0.0014	2064, 7220, 5582, 185, 6915, 5156	ERBB2, TRPC1, PRKCG, AGTR1, TBXA2R, PDGFRA
Viral myocarditis	hsa05416	4	0.0009	0.0015	54205, 1756, 942, 3133	CYCS, DMD, CD86, HLA-E
RIG-I-like receptor signaling pathway	hsa04622	4	0.0009	0.0015	3661, 5970, 5300, 9636	IRF3, RELA, PIN1, ISG15
Cell cycle	hsa04110	5	0.001	0.0016	4088, 3065, 5111, 7042, 4089	SMAD3, HDAC1, PCNA, TGFB2, SMAD4
VEGF signaling pathway	hsa04370	4	0.0012	0.0019	5582, 207, 5594, 5595	PRKCG, AKT1, MAPK1, MAPK3
Cytokine-cytokine receptor interaction	hsa04060	7	0.0013	0.002	2277, 8600, 2689, 7042, 5156, 5155, 3565	FIGF, TNFSF11, GH2, TGFB2, PDGFRA, PDGFB, IL4
Prion diseases	hsa05020	3	0.0013	0.002	1958, 5594, 5595	EGR1, MAPK1, MAPK3
Fc epsilon RI signaling pathway	hsa04664	4	0.0014	0.0021	207, 5594, 5595, 3565	AKT1, MAPK1, MAPK3, IL4
Allograft rejection	hsa05330	3	0.0015	0.0023	942, 3133, 3565	CD86, HLA-E, IL4
Progesterone-mediated oocyte maturation	hsa04914	4	0.0019	0.0028	207, 5594, 5595, 27330	AKT1, MAPK1, MAPK3, RPS6KA6
Aldosterone-regulated sodium reabsorption	hsa04960	3	0.0021	0.0031	5582, 5594, 5595	PRKCG, MAPK1, MAPK3
ABC transporters	hsa02010	3	0.0024	0.0035	1244, 5244, 4363	ABCC2, ABCB4, ABCC1
Phagosome	hsa04145	5	0.0025	0.0036	3678, 1535, 3133, 1536, 4481	ITGA5, CYBA, HLA-E, CYBB, MSR1
GnRH signaling pathway	hsa04912	4	0.0034	0.0048	3725, 468, 5594, 5595	JUN, ATF4, MAPK1, MAPK3
Protein processing in endoplasmic reticulum	hsa04141	5	0.0035	0.0049	596, 5610, 468, 4780, 823	BCL2, EIF2AK2, ATF4, NFE2L2, CAPN1
Autoimmune thyroid disease	hsa05320	3	0.0039	0.0054	942, 3133, 3565	CD86, HLA-E, IL4
Amyotrophic lateral sclerosis (ALS)	hsa05014	3	0.0042	0.0057	596, 54205, 598	BCL2, CYCS, BCL2L1
Primary bile acid biosynthesis	hsa00120	2	0.0042	0.0057	1582, 1109	CYP8B1, AKR1C4
Hedgehog signaling pathway	hsa04340	3	0.0048	0.0064	2737, 6469, 4036	GLI3, SHH, LRP2
Mismatch repair	hsa03430	2	0.0086	0.0112	5981, 5111	RFC1, PCNA
Complement and coagulation cascades	hsa04610	3	0.0086	0.0112	5340, 5328, 7056	PLG, PLAU, THBD
Long-term depression	hsa04730	3	0.009	0.0113	5582, 5594, 5595	PRKCG, MAPK1, MAPK3
Bacterial invasion of epithelial cells	hsa05100	3	0.009	0.0113	3678, 387, 859	ITGA5, RHOA, CAV3
Tight junction	hsa04530	4	0.0088	0.0113	387, 5582, 5521, 207	RHOA, PRKCG, PPP2R2B, AKT1
Vitamin digestion and absorption	hsa04977	2	0.0093	0.0116	8029, 4363	CUBN, ABCC1
Natural killer cell mediated cytotoxicity	hsa04650	4	0.0097	0.0119	5582, 5594, 3133, 5595	PRKCG, MAPK1, HLA-E, MAPK3
African trypanosomiasis	hsa05143	2	0.0192	0.0231	3620, 5582	IDO1, PRKCG
Primary immunodeficiency	hsa05340	2	0.0192	0.0231	5788, 3718	PTPRC, JAK3
DNA replication	hsa03030	2	0.0202	0.0241	5981, 5111	RFC1, PCNA
Basal transcription factors	hsa03022	2	0.0213	0.0251	2969, 6908	GTF2I, TBP
Pancreatic secretion	hsa04972	3	0.0239	0.0279	7220, 387, 5582	TRPC1, RHOA, PRKCG
Huntington's disease	hsa05016	4	0.0259	0.0296	3065, 54205, 1537, 6908	HDAC1, CYCS, CYC1, TBP
Graft-versus-host disease	hsa05332	2	0.0258	0.0296	942, 3133	CD86, HLA-E
Type I diabetes mellitus	hsa04940	2	0.0282	0.0319	942, 3133	CD86, HLA-E
Nucleotide excision repair	hsa03420	2	0.0294	0.0329	5981, 5111	RFC1, PCNA
Oocyte meiosis	hsa04114	3	0.0311	0.0345	5594, 5595, 27330	MAPK1, MAPK3, RPS6KA6
Type II diabetes mellitus	hsa04930	2	0.0345	0.0379	5594, 5595	MAPK1, MAPK3
Arginine and proline metabolism	hsa00330	2	0.0428	0.0465	5625, 4953	PRODH, ODC1
Steroid hormone biosynthesis	hsa00140	2	0.0457	0.0487	1585, 1109	CYP11B2, AKR1C4
Cytosolic DNA-sensing pathway	hsa04623	2	0.0457	0.0487	3661, 5970	IRF3, RELA

## Sheet: common gene
Pathway	KEGG ID	Number of genes	P-value	Adjusted P-value	Gene ID	Gene symbol
Pathways in cancer	hsa05200	9	2.04e-11	5.71e-10	2033, 6258, 4149, 5468, 4609, 6772, 7157, 1488, 1026	EP300, RXRG, MAX, PPARG, MYC, STAT1, TP53, CTBP2, CDKN1A
PPAR signaling pathway	hsa03320	6	6.31e-11	8.83e-10	6258, 335, 5468, 51, 2172, 5465	RXRG, APOA1, PPARG, ACOX1, FABP6, PPARA
Thyroid cancer	hsa05216	4	1.64e-08	1.53e-07	6258, 5468, 4609, 7157	RXRG, PPARG, MYC, TP53
Chronic myeloid leukemia	hsa05220	4	7.29e-07	5.1e-06	1488, 1026, 4609, 7157	CTBP2, CDKN1A, MYC, TP53
Small cell lung cancer	hsa05222	4	1.35e-06	7.56e-06	6258, 4149, 4609, 7157	RXRG, MAX, MYC, TP53
Maturity onset diabetes of the young	hsa04950	3	1.81e-06	8.45e-06	3170, 3174, 3172	FOXA2, HNF4G, HNF4A
Cell cycle	hsa04110	4	6.07e-06	2.43e-05	2033, 1026, 4609, 7157	EP300, CDKN1A, MYC, TP53
Bladder cancer	hsa05219	3	8.92e-06	2.78e-05	1026, 4609, 7157	CDKN1A, MYC, TP53
Hepatitis C	hsa05160	4	8.25e-06	2.78e-05	1026, 6772, 7157, 5465	CDKN1A, STAT1, TP53, PPARA
Wnt signaling pathway	hsa04310	4	1.29e-05	3.61e-05	2033, 1488, 4609, 7157	EP300, CTBP2, MYC, TP53
Huntington's disease	hsa05016	4	2.81e-05	7.15e-05	2033, 5468, 6667, 7157	EP300, PPARG, SP1, TP53
Adipocytokine signaling pathway	hsa04920	3	3.83e-05	8.94e-05	6258, 6517, 5465	RXRG, SLC2A4, PPARA
TGF-beta signaling pathway	hsa04350	3	7.2e-05	0.0002	2033, 4609, 6667	EP300, MYC, SP1
Prostate cancer	hsa05215	3	8.56e-05	0.0002	2033, 1026, 7157	EP300, CDKN1A, TP53
Circadian rhythm - mammal	hsa04710	2	0.0002	0.0004	6095, 406	RORA, ARNTL
Jak-STAT signaling pathway	hsa04630	3	0.0004	0.0007	2033, 4609, 6772	EP300, MYC, STAT1
Notch signaling pathway	hsa04330	2	0.0009	0.0015	2033, 1488	EP300, CTBP2
Endometrial cancer	hsa05213	2	0.0011	0.0017	4609, 7157	MYC, TP53
Non-small cell lung cancer	hsa05223	2	0.0012	0.0018	6258, 7157	RXRG, TP53
Colorectal cancer	hsa05210	2	0.0016	0.0022	4609, 7157	MYC, TP53
p53 signaling pathway	hsa04115	2	0.0019	0.0024	1026, 7157	CDKN1A, TP53
Melanoma	hsa05218	2	0.0021	0.0024	1026, 7157	CDKN1A, TP53
Glioma	hsa05214	2	0.0018	0.0024	1026, 7157	CDKN1A, TP53
MAPK signaling pathway	hsa04010	3	0.0021	0.0024	4149, 4609, 7157	MAX, MYC, TP53
Pancreatic cancer	hsa05212	2	0.002	0.0024	6772, 7157	STAT1, TP53
ErbB signaling pathway	hsa04012	2	0.0031	0.0033	1026, 4609	CDKN1A, MYC
Metabolic pathways	hsa01100	5	0.0042	0.0044	1621, 5833, 51, 1573, 7358	DBH, PCYT2, ACOX1, CYP2J2, UGDH
Osteoclast differentiation	hsa04380	2	0.0066	0.0066	5468, 6772	PPARG, STAT1
